# Supplementary material for: Degradation of lignin with aqueous ammonium-based ionic liquid solutions under milder conditions
Source: Royal Society of Chemistry journal article supplement (doi:10.1039/c8nj05185b), 2019-01-01
Supplement: c8nj05185b1.pdf [file c8nj05185b1.pdf]

*New Journal of Chemistry*

***Degradation of Lignin with Aqueous Ammonium-Based Ionic Liquid  
Solutions under Milder Condition***

Leta Deressa Tolesa, Bhupender S. Gupta, and Ming-Jer Lee\*

## Electronic Supplementary Information

**Table S1**

The possible functional groups and the corresponding wavenumber of post-treated samples of lignin in aqueous solution of [DMBA][Ac] or [DMBA][B] at various reaction conditions of temperature ( $T$ ) and time interval ( $t$ ).

| $T$<br>(°C)                 | $t$<br>(min) | wavenumber<br>(cm <sup>-1</sup> ) |              |                 |                  |
|-----------------------------|--------------|-----------------------------------|--------------|-----------------|------------------|
|                             |              | OH                                | <i>C - H</i> | Benzene<br>ring | <i>C - O</i>     |
| Lignin in 50 wt% [DMBA][Ac] |              |                                   |              |                 |                  |
| 90                          | 60           | 3378                              | 2909         | 1648            | 1028, 1045, 1123 |
| 120                         | 60           | 3378                              | 2909         | 1640            | 1036, 1084, 1123 |
| 150                         | 60           | 3358                              | 2909         | 1640            | 1028, 1076, 1142 |
| 180                         | 30           | 3358                              | 2908         | 1631            | 1036, 1134       |
| 180                         | 60           | 3370                              | 2908         | 1631            | 1036, 1145       |
| 180                         | 120          | 3382                              | 2908         | 1631            | 1036, 1145       |
| Lignin in 80 wt% [DMBA][Ac] |              |                                   |              |                 |                  |
| 180                         | 30           | 3345                              | 2921         | 1631            | 1036, 1134       |
| 180                         | 60           | 3370                              | 2921         | 1631            | 1036, 1145       |
| 180                         | 120          | 3370                              | 2921         | 1631            | 1036, 1170       |
| Lignin in 30 wt% [DMBA][B]  |              |                                   |              |                 |                  |
| 180                         | 30           | 3370                              | 2921         | 1631            | 1049, 1182       |
| 180                         | 60           | 3358                              | 2921         | 1631            | 1049, 1170       |
| 180                         | 120          | 3370                              | 2921         | 1631            | 1036, 1170       |
| Lignin in 50 wt% [DMBA][B]  |              |                                   |              |                 |                  |
| 90                          | 60           | 3408                              | 2921         | 1608            | 1049, 1182       |
| 120                         | 60           | 3408                              | 2921         | 1608            | 1049, 1182       |
| 150                         | 60           | 3408                              | 2921         | 1608            | 1049, 1182       |
| 180                         | 30           | 3395                              | 2921         | 1608            | 1036, 1182       |
| 180                         | 60           | 3370                              | 2921         | 1608            | 1036, 1182       |
| 180                         | 120          | 3370                              | 2921         | 1608            | 1036, 1182       |
| Lignin in 80 wt% [DMBA][B]  |              |                                   |              |                 |                  |
| 180                         | 30           | 3382                              | 2921         | 1631            | 1036, 1145       |
| 180                         | 60           | 3370                              | 2921         | 1631            | 1036, 1134       |
| 180                         | 120          | 3370                              | 2921         | 1631            | 1036, 1182       |

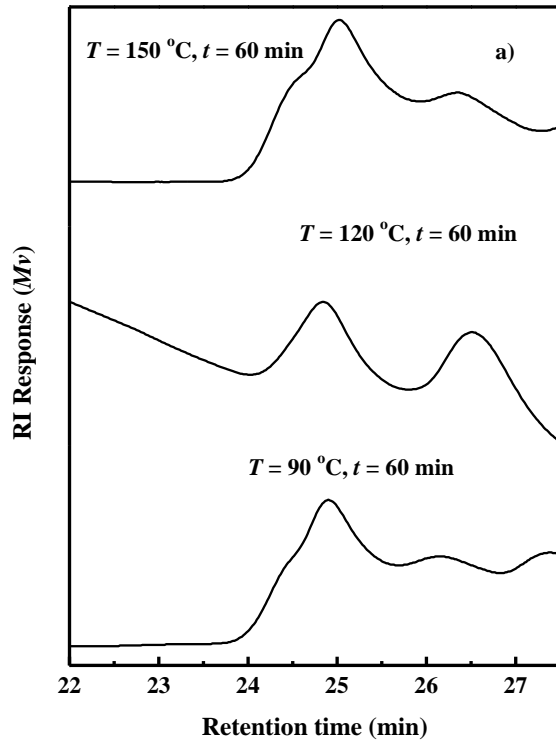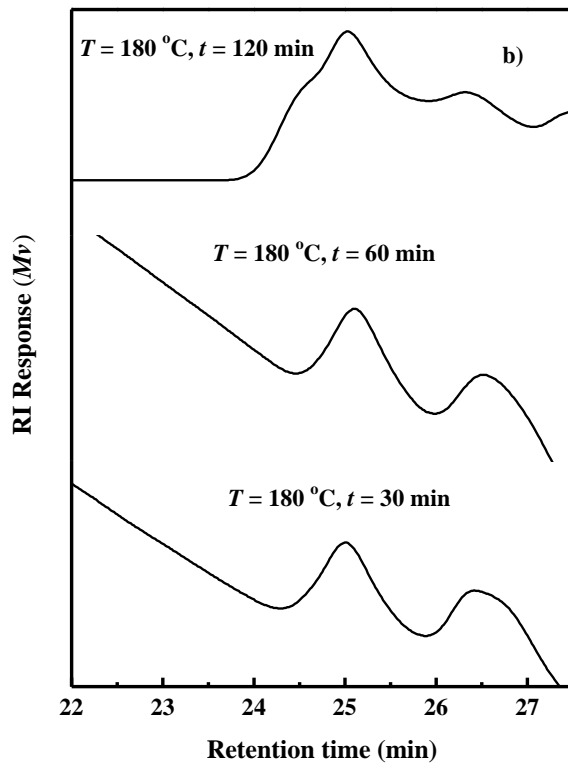

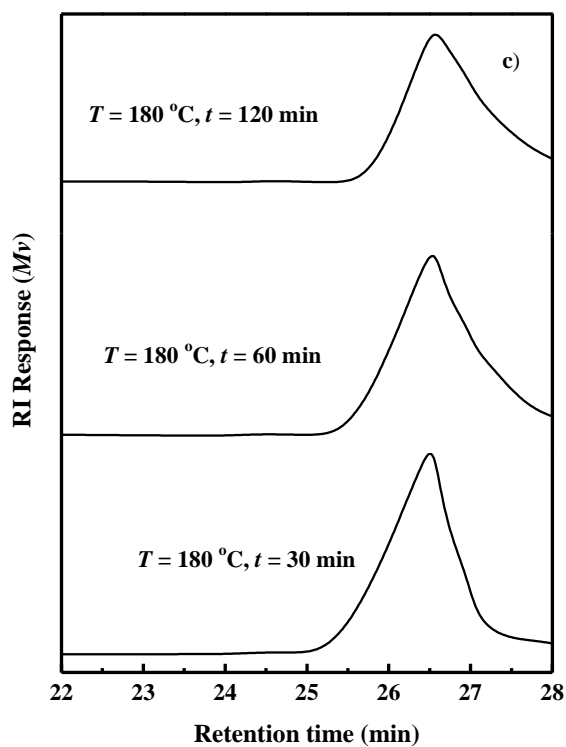

**Fig. S1** The GPC analyses of depolymerized lignin in 50 wt% (a,b) and 80 wt% (c) of [DMBA][Ac] aqueous solutions at different experimental conditions.

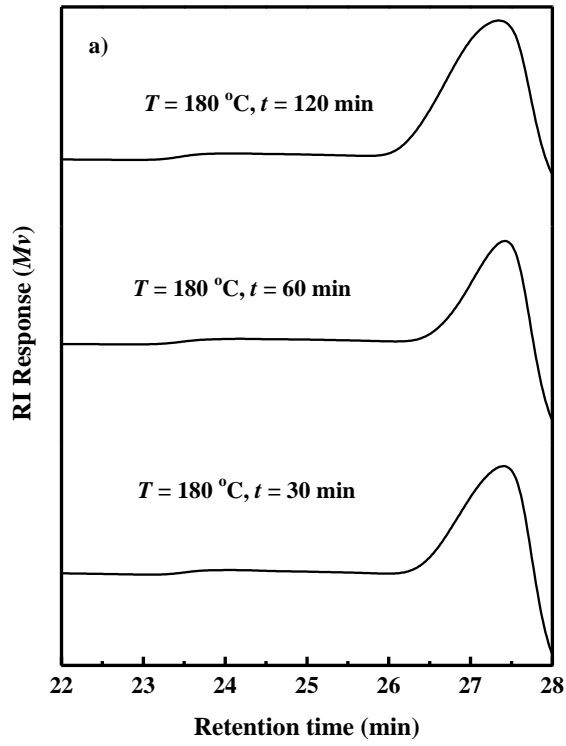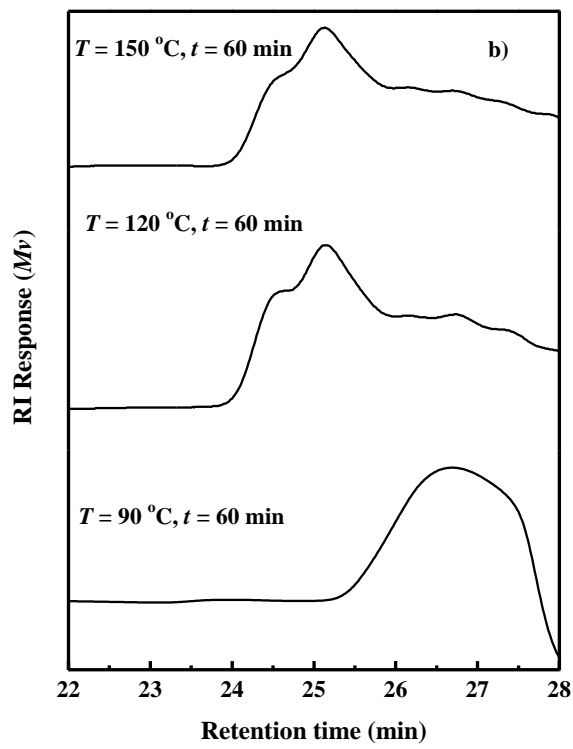

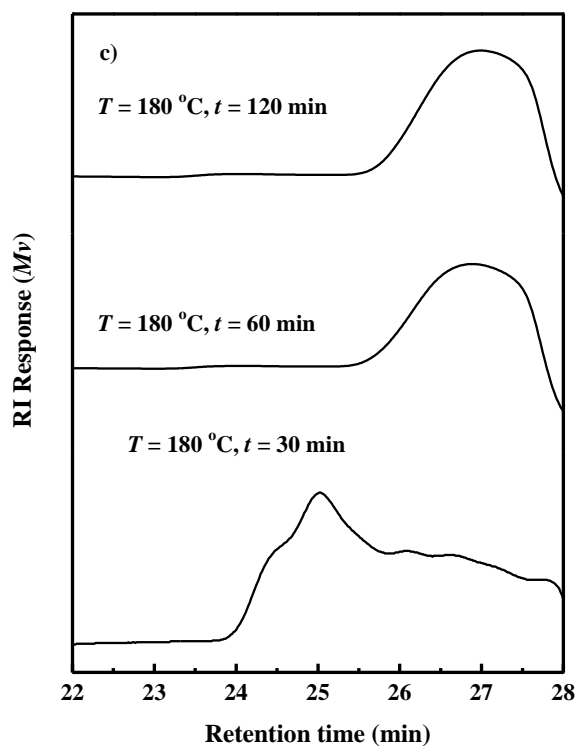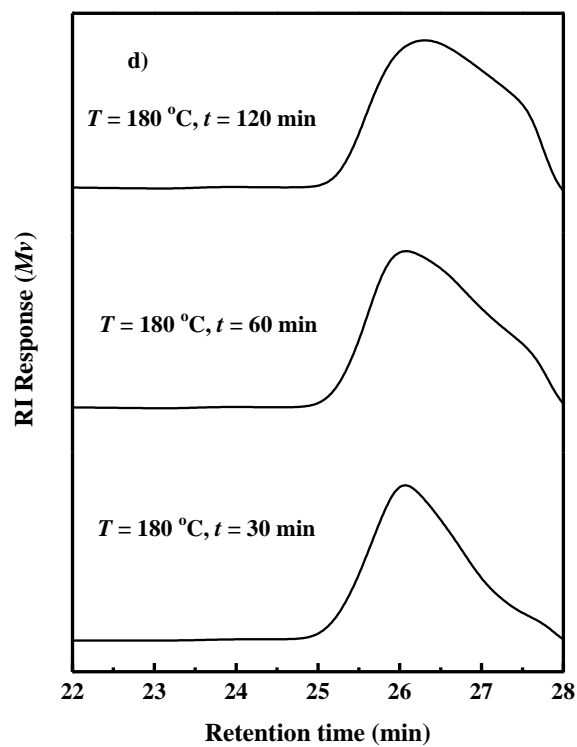

**Fig. S2** The GPC analyses of depolymerized lignin 30 wt% (a), 50 wt% (b, c) and 80 wt % (d) of [DMBA][B] aqueous solutions at different experimental conditions.

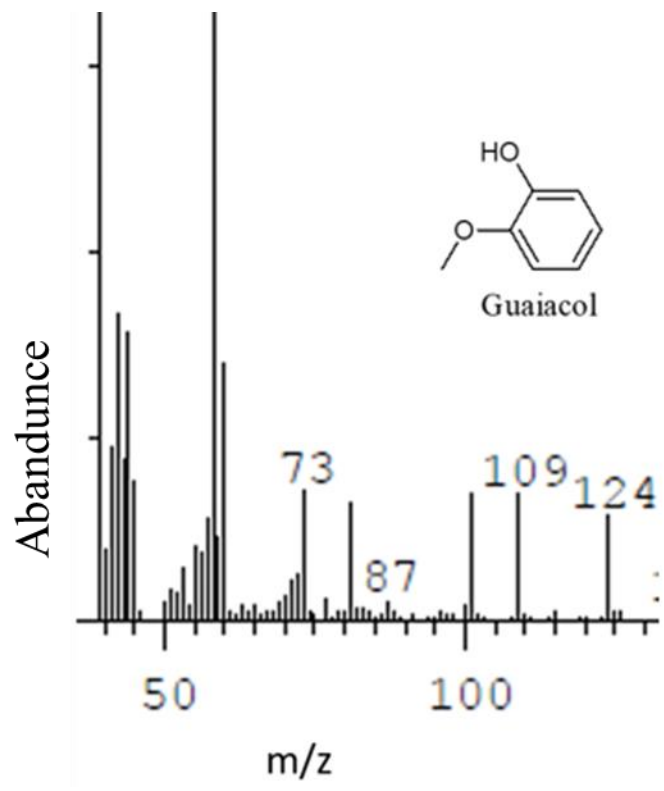

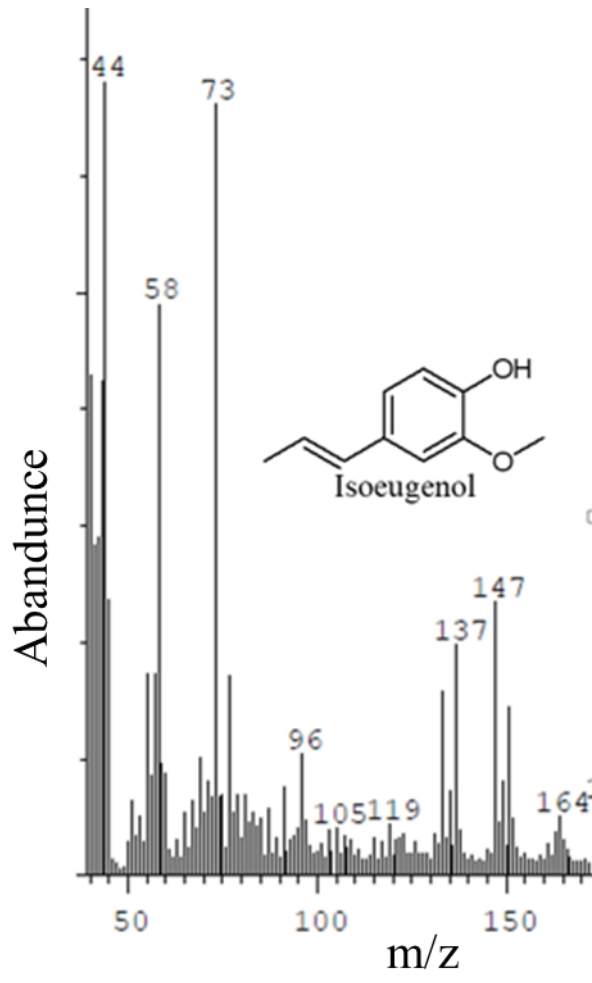



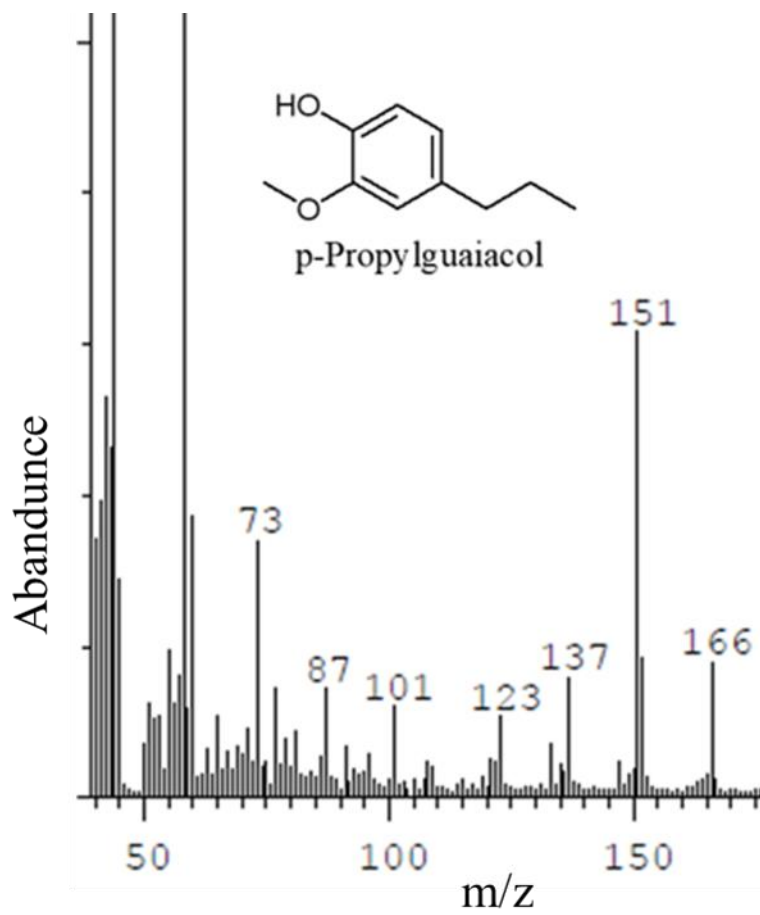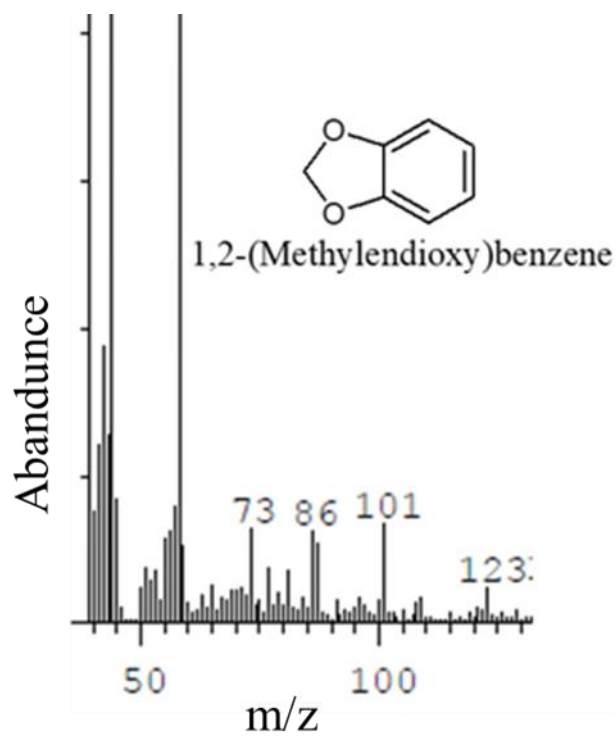

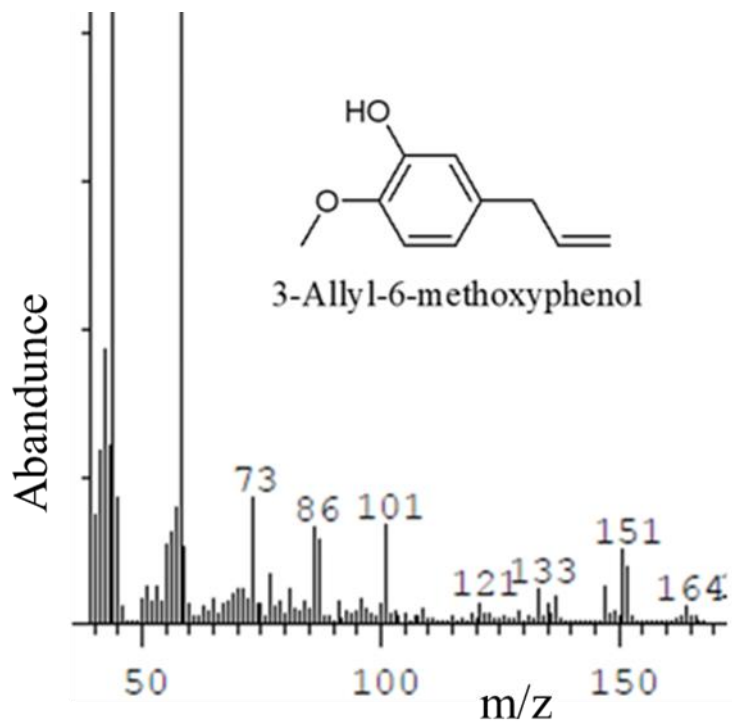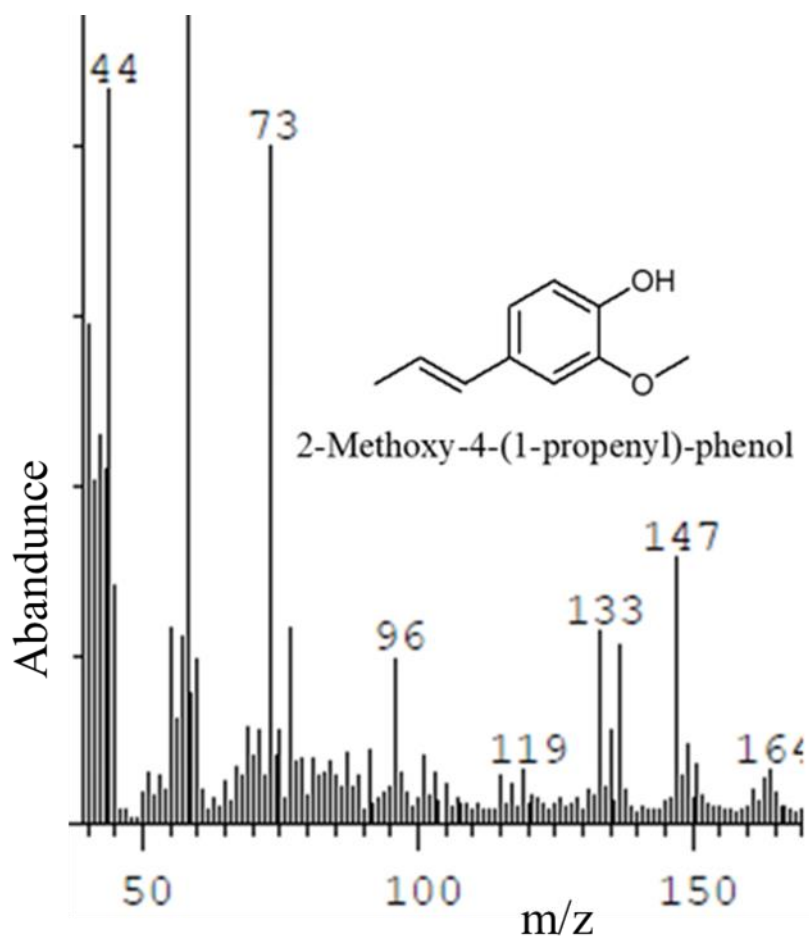

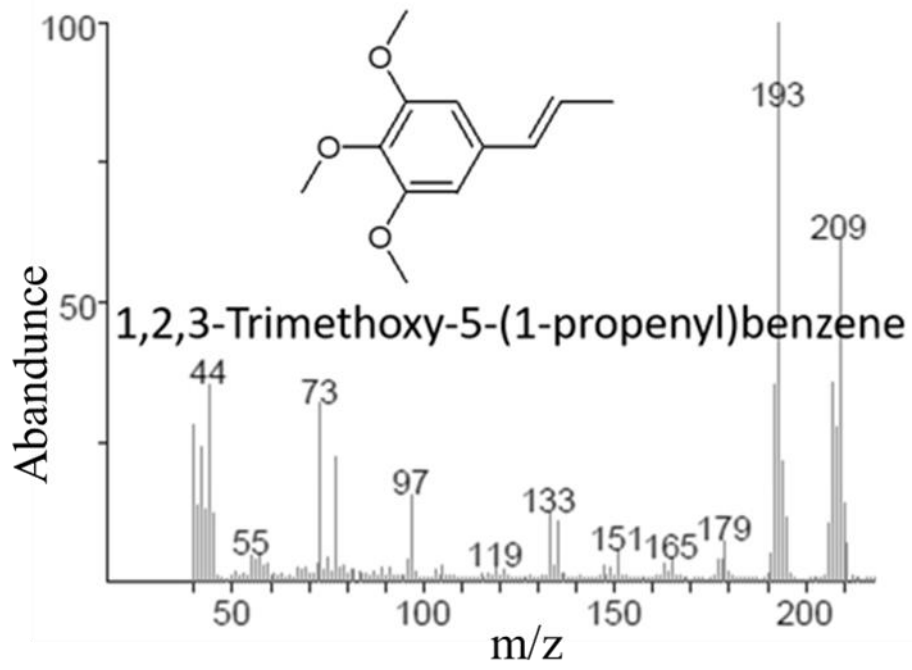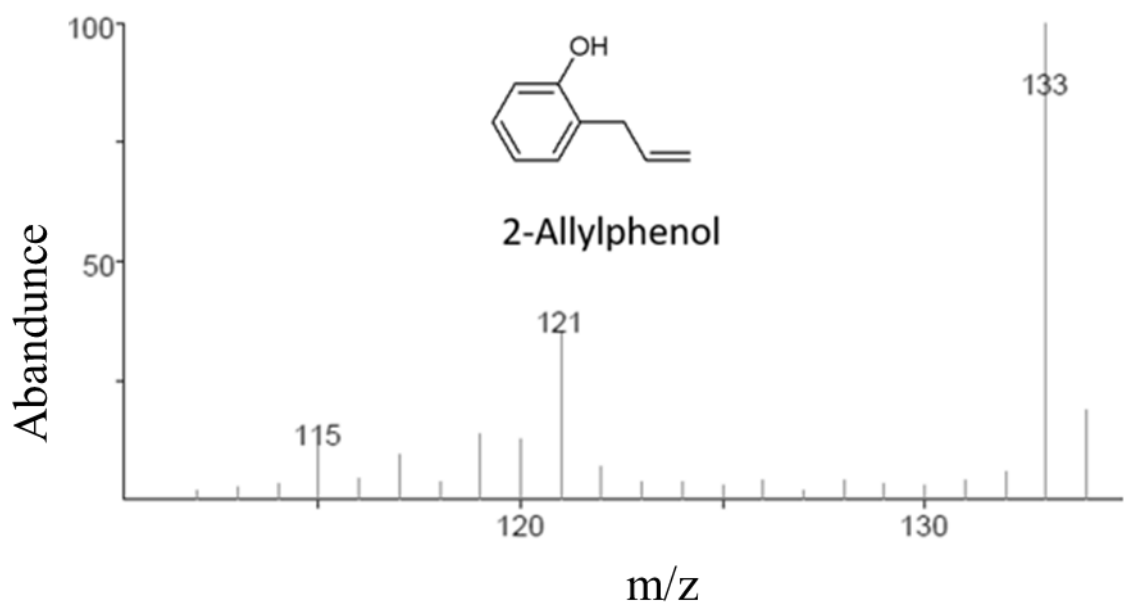

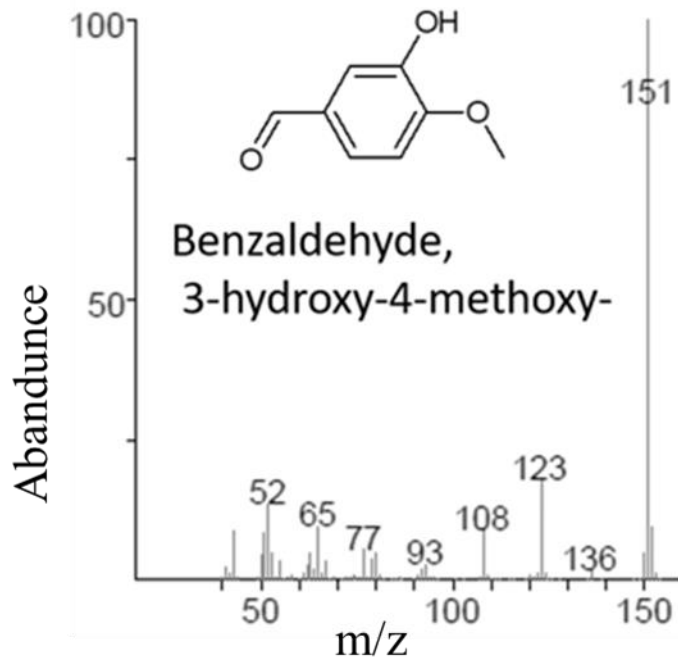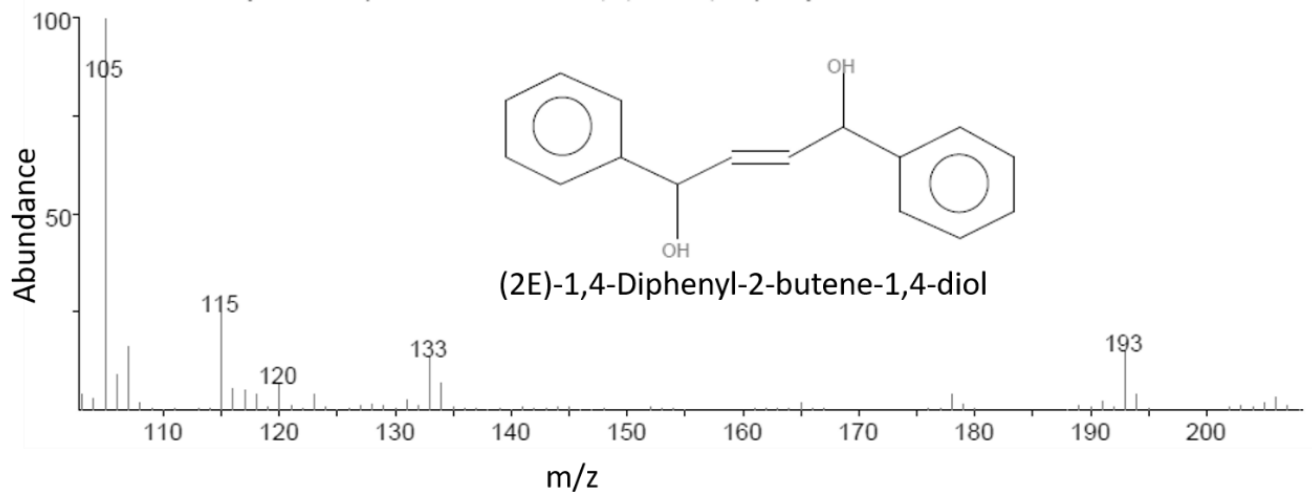

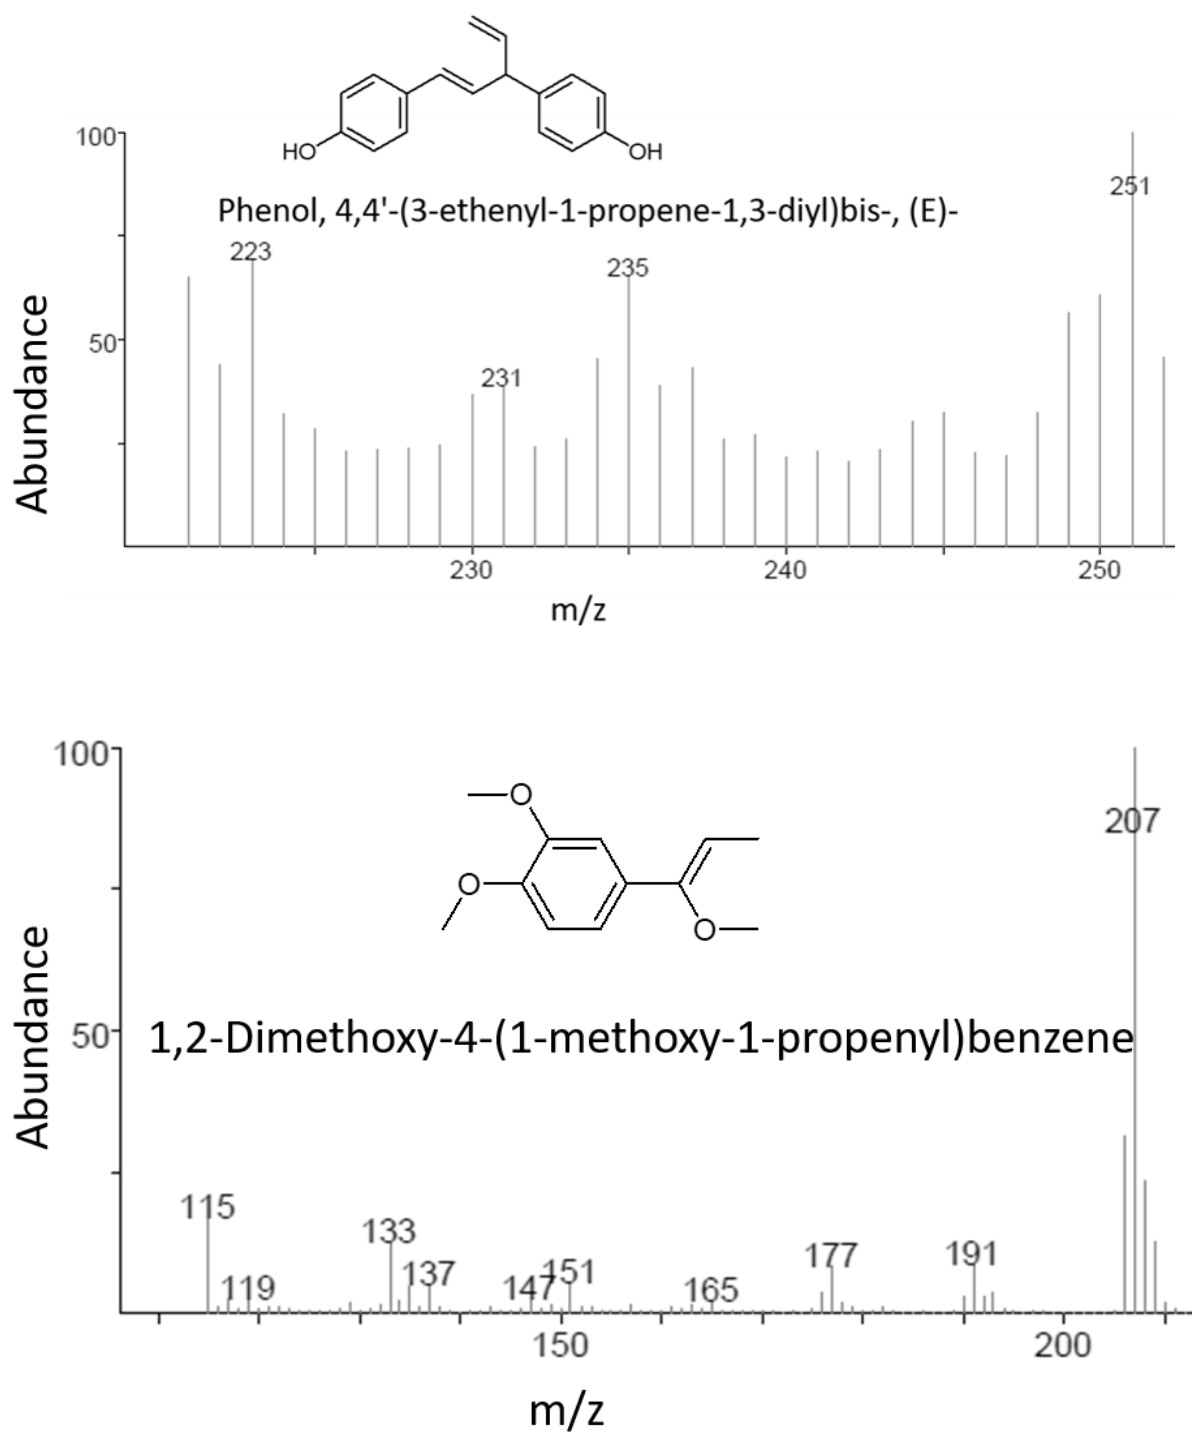

**Fig. S3** The mass spectra and molecular structures of the major phenolic compounds obtained from depolymerized lignin in aqueous [DMBA][Ac] and [DMBA][B] solutions.

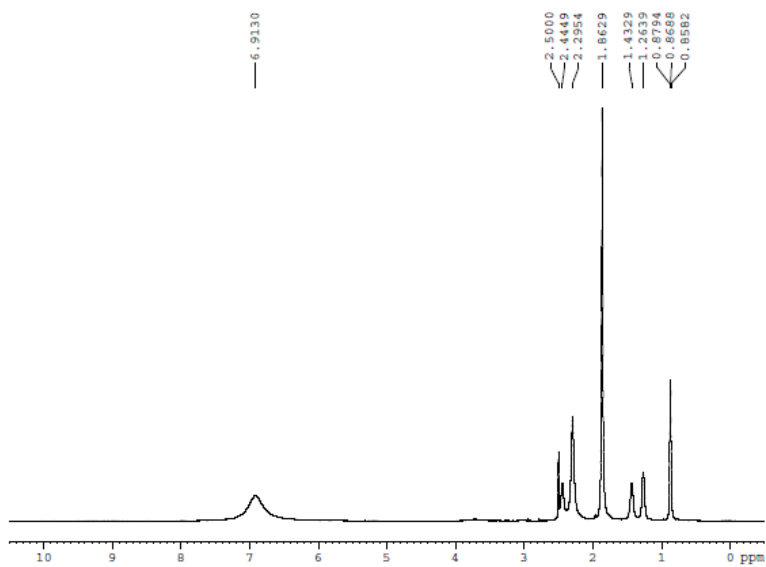

**Fig. S4** The  $^1\text{H}$ NMR spectrum of depolymerized lignin in 50wt% [DMBA][Ac] aqueous solutions at favorable reaction conditions (at 180 °C for 60 min).

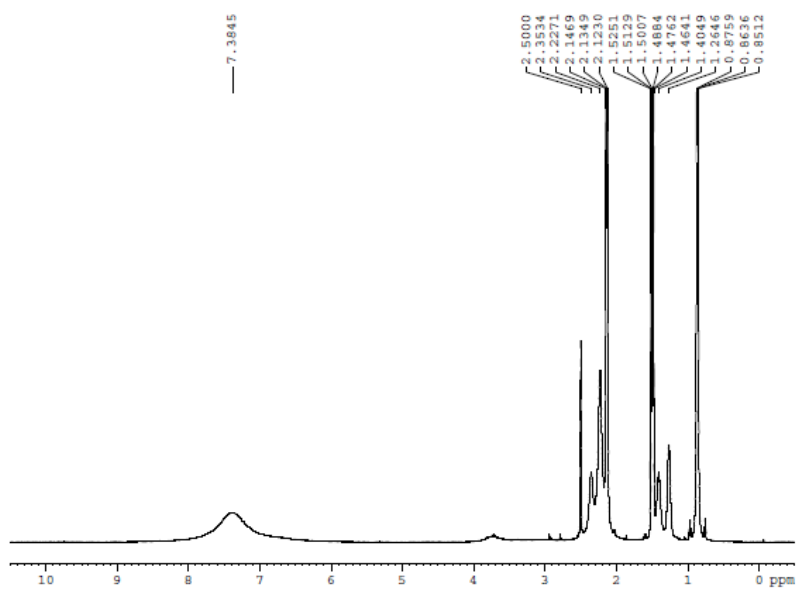

**Fig. S5** The  $^1\text{H}$ NMR spectrum of depolymerized lignin in 50 wt% [DMBA][B] aqueous solutions at favorable reaction conditions (at 180 °C for 60 min).

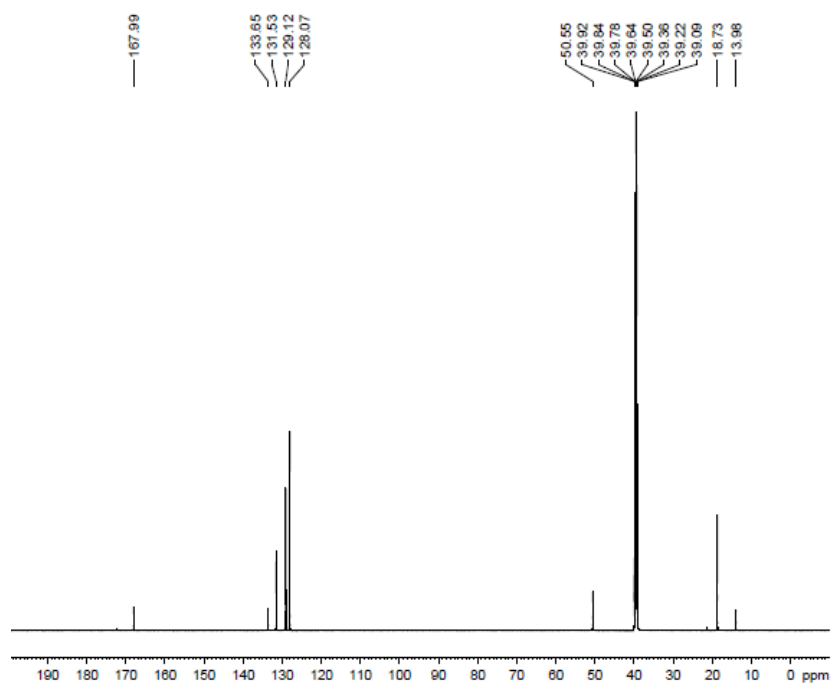

**Fig. S6** The  $^{13}\text{C}$ NMR spectrum of depolymerized lignin in 50wt% [DMBA][Ac] aqueous solutions at favorable reaction conditions (at 180 °C for 60 min).

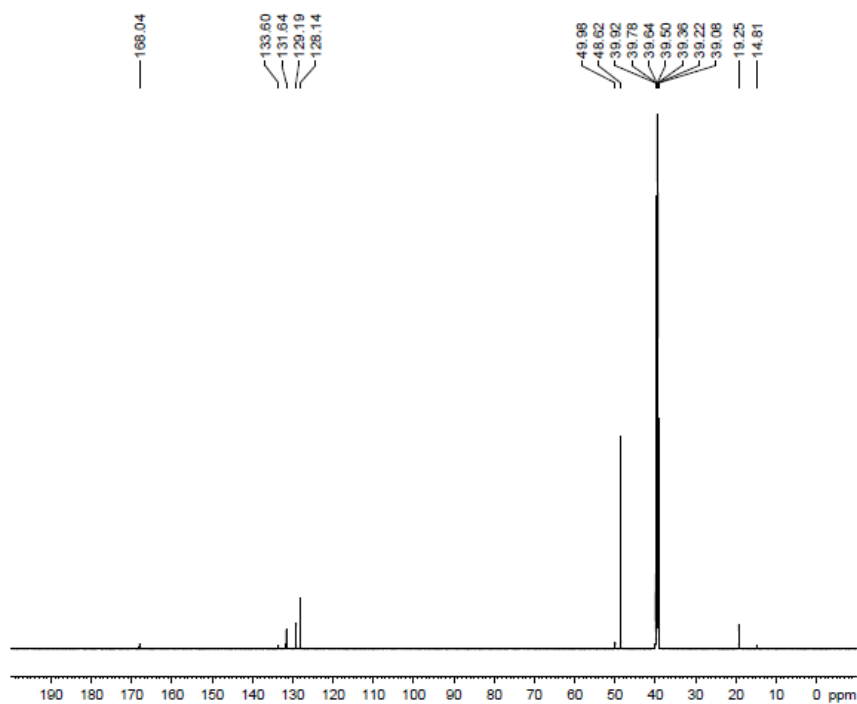

**Fig. S7** The  $^{13}\text{C}$ NMR spectrum of depolymerized lignin in 50 wt% [DMBA][B] aqueous solutions at favorable reaction conditions (at 180 °C for 60 min).
